# Supplementary material for: Reference ranges for cardiac structure and function using cardiovascular magnetic resonance (CMR) in Caucasians from the UK Biobank population cohort
Source: Springer Nature journal article supplement (doi:10.1186/s12968-017-0327-9), 2016-12-01
Supplement: MOESM1 [file 12052950]

# CMR REFERENCE RANGES FOR AGES 45-74: DATA FROM THE UK BIOBANK

|                                                   | MALE         |             |               | FEMALE       |             |               |
|---------------------------------------------------|--------------|-------------|---------------|--------------|-------------|---------------|
|                                                   | Abnormal low | Normal zone | Abnormal high | Abnormal low | Normal zone | Abnormal high |
| <b>Left ventricle</b>                             |              |             |               |              |             |               |
| LVEDV (ml)                                        | <93          | 109 - 218   | >232          | <80          | 88 - 161    | >175          |
| LVESV (ml)                                        | <34          | 39 - 97     | >103          | <25          | 31 - 68     | >73           |
| LVSV (ml)                                         | <49          | 59 - 132    | >140          | <47          | 49 - 100    | >110          |
| LV mass (g)                                       | <56          | 64 - 141    | >148          | <44          | 46 - 93     | >96           |
| indexed LVEDV (ml/m <sup>2</sup> )                | <52          | 60 - 110    | >117          | <50          | 54 - 94     | >101          |
| indexed LVESV (ml/m <sup>2</sup> )                | <19          | 21 - 49     | >52           | <16          | 19 - 40     | >43           |
| indexed LVSV (ml/m <sup>2</sup> )                 | <28          | 32 - 67     | >70           | <29          | 30 - 59     | >63           |
| indexed LV mass (g/m <sup>2</sup> )               | <33          | 35 - 70     | >72           | <28          | 29 - 55     | >55           |
| LVEF (%)                                          | <47          | 48 - 69     | >70           | <50          | 51 - 70     | >72           |
| LV mass to volume ratio (g/ml)                    | <0.40        | 0.42 - 0.84 | >0.87         | <0.35        | 0.39 - 0.71 | >0.81         |
| <b>Right ventricle</b>                            |              |             |               |              |             |               |
| RVEDV (ml)                                        | <99          | 124 - 248   | >260          | <83          | 85 - 168    | >192          |
| RVESV (ml)                                        | <34          | 47 - 123    | >135          | <26          | 27 - 77     | >95           |
| RVSV (ml)                                         | <54          | 62 - 131    | >140          | <47          | 48 - 99     | >107          |
| indexed RVEDV (ml/m <sup>2</sup> )                | <55          | 68 - 125    | >128          | <51          | 53 - 99     | >110          |
| indexed RVESV (ml/m <sup>2</sup> )                | <19          | 25 - 63     | >67           | <16          | 17 - 46     | >55           |
| indexed RVSV (ml/m <sup>2</sup> )                 | <30          | 34 - 67     | >69           | <29          | 30 - 59     | >61           |
| RVEF (%)                                          | <40          | 45 - 65     | >68           | <45          | 47 - 68     | >70           |
| <b>Left atrium</b>                                |              |             |               |              |             |               |
| Max. LA vol (2Ch) (ml)                            | <22          | 30 - 104    | >112          | <22          | 30 - 104    | >112          |
| Max. LA vol (4Ch) (ml)                            | <23          | 36 - 124    | >125          | <23          | 36 - 124    | >125          |
| Max. LA vol (Biplane) (ml)                        | <26          | 37 - 108    | >112          | <26          | 37 - 108    | >112          |
| LA SV (Biplane) (ml)                              | <16          | 23 - 62     | >66           | <16          | 23 - 62     | >66           |
| indexed Max. LA vol (2Ch) (ml/m <sup>2</sup> )    | <12          | 16 - 53     | >56           | <12          | 16 - 53     | >56           |
| indexed Max. LA vol (4Ch) (ml/m <sup>2</sup> )    | <14          | 19 - 62     | >63           | <14          | 19 - 62     | >63           |
| indexed Max LA vol (Biplane) (ml/m <sup>2</sup> ) | <15          | 19 - 55     | >56           | <15          | 19 - 55     | >56           |
| indexed LA SV (Biplane) (ml/m <sup>2</sup> )      | <9           | 12 - 32     | >33           | <9           | 12 - 32     | >33           |
| LA EF (Biplane) (%)                               | <44          | 47 - 73     | >75           | <44          | 47 - 73     | >75           |
| <b>Right atrium</b>                               |              |             |               |              |             |               |
| Max. RA vol (4Ch) (ml)                            | <36          | 43 - 143    | >150          | <36          | 43 - 143    | >150          |
| RA SV (4Ch) (ml)                                  | <9           | 10 - 66     | >66           | <9           | 10 - 66     | >66           |
| indexed Max. RA vol (4Ch) (ml/m <sup>2</sup> )    | <19          | 22 - 74     | >79           | <19          | 22 - 74     | >79           |
| indexed RA SV (4Ch) (ml/m <sup>2</sup> )          | <5           | 5 - 33      | >35           | <5           | 5 - 33      | >35           |
| RA EF (4Ch) (%)                                   | <21          | 23 - 58     | >60           | <21          | 23 - 58     | >60           |

Data described in this table can be found in the paper entitled "Reference ranges for cardiac structure and function using cardiovascular magnetic resonance (CMR) in Caucasians from the UK Biobank population cohort" by Petersen et al. in the Journal of Cardiovascular Magnetic Resonance, 2017. DOI 10.1186/s12968-017-0327-9  
Borderline zone data can be found in the main manuscript.
